# Supplementary material for: Radioactive Iodine Treatment for Thyroid Cancer Patients Increases the Risk of Long-Term Gastrointestinal Disorders: A Nationwide Population-Based Cohort Analysis
Source: MDPI journal article supplement (doi:10.3390/cancers14102505), 2022-05-19
Supplement: s1 [file s1]

# Supplementary Material: Radioactive Iodine Treatment for Thyroid Cancer Patients Increases the Risk of Long-Term Gastrointestinal Disorders: A Nationwide Population-Based Cohort Analysis

Yueh Lee, Chi-Hsiang Chung, Li-Fan Lin, Chuang-Hsin Chiu, Yi-Feng Chen, Chao-Feng Chang, Cheng-Yi Cheng \* and Wu-Chien Chien \*

**Table S1.** ICD-9-CM codes used in this study for data extraction and analysis.

| ICD-9-CM / NHI Code / Definition                  |                                              |
|---------------------------------------------------|----------------------------------------------|
| <b>Study population</b>                           |                                              |
| Thyroid cancer                                    | 193                                          |
| Thyroidectomy                                     | OP06.4                                       |
| <b>Intervention:</b> Radioactive iodine treatment | OP92.29, 26038B                              |
| <b>Excluding:</b> Other cancers                   | 140–208, except for thyroid cancer           |
| <b>Outcome:</b> Gastrointestinal disorders        | Any of the listed                            |
| Ulcer                                             | 531–534                                      |
| Gastric ulcer                                     | 531                                          |
| Duodenal ulcer                                    | 532                                          |
| Peptic ulcer                                      | 533                                          |
| Gastrojejunal ulcer                               | 534                                          |
| Malignant neoplasm of stomach                     | 151                                          |
| Atrophic gastritis                                | 535.1                                        |
| <b>Comorbidities</b>                              |                                              |
| <i>Helicobacter pylori</i> infection              | 041.86                                       |
| Obesity                                           | 278                                          |
| Alcoholism                                        | 303, 305.0, V11.3                            |
| Chronic lymphocytic thyroiditis                   | 245.2                                        |
| Celiac disease                                    | 579.0                                        |
| <b>Charlson Comorbidity Index Revised (CCI_R)</b> | CCI removed cancer, and peptic ulcer disease |

ICD-9-CM, International Classification of Diseases, Ninth Revision, Clinical Modification; NHI, national health insurance; CCI\_R, revised Charlson comorbidity index

**Table S2.** Years to Develop Gastrointestinal Disorders.

| RAI     | Min  | Median | Max   | Mean ± SD   |
|---------|------|--------|-------|-------------|
| With    | 0.02 | 3.19   | 12.95 | 3.82 ± 3.01 |
| Without | 0.09 | 3.39   | 11.53 | 3.81 ± 2.78 |
| Total   | 0.02 | 3.22   | 12.95 | 3.82 ± 2.97 |

RAI, radioactive iodine; SD, standard deviation

**Table S3.** Risk factors analysis for gastrointestinal disorders stratified by variables listed in the table by using Cox regression.

| RAI<br>Stratified                            | With   |           |                                | Without |         |                                | With vs. Without (Reference) |             |        |        |        |
|----------------------------------------------|--------|-----------|--------------------------------|---------|---------|--------------------------------|------------------------------|-------------|--------|--------|--------|
|                                              | Events | PYs       | Rate (per 10 <sup>5</sup> PYs) | Events  | PYs     | Rate (per 10 <sup>5</sup> PYs) | Ratio                        | Adjusted HR | 95% CI | 95% CI | p      |
| <b>Total</b>                                 | 218    | 12,034.78 | 1811.42                        | 42      | 3169.54 | 1325.11                        | 1.367                        | 1.314       | 1.040  | 1.842  | 0.029* |
| <b>Gender</b>                                |        |           |                                |         |         |                                |                              |             |        |        |        |
| Male                                         | 65     | 2379.52   | 2731.64                        | 12      | 620.67  | 1933.41                        | 1.413                        | 1.361       | 1.052  | 2.001  | 0.015* |
| Female                                       | 153    | 9655.26   | 1584.63                        | 30      | 2548.88 | 1176.99                        | 1.346                        | 1.265       | 0.703  | 1.796  | 0.398  |
| <b>Age groups (years)</b>                    |        |           |                                |         |         |                                |                              |             |        |        |        |
| 20–39                                        | 16     | 2169.31   | 737.56                         | 5       | 684.20  | 730.78                         | 1.009                        | 1.114       | 0.663  | 1.902  | 0.688  |
| 40–59                                        | 77     | 5297.00   | 1453.65                        | 18      | 1350.02 | 1333.31                        | 1.090                        | 1.135       | 0.468  | 2.684  | 0.735  |
| 60–79                                        | 90     | 3719.21   | 2419.87                        | 14      | 911.05  | 1536.68                        | 1.575                        | 1.199       | 1.052  | 3.402  | 0.009* |
| ≥ 80                                         | 35     | 849.27    | 4121.18                        | 5       | 224.26  | 2229.51                        | 1.848                        | 1.742       | 1.197  | 3.241  | 0.001* |
| <b>Helicobacter pylori infection</b>         |        |           |                                |         |         |                                |                              |             |        |        |        |
| Without                                      | 218    | 12,034.66 | 1811.43                        | 41      | 3162.27 | 1296.54                        | 1.397                        | 1.310       | 1.037  | 1.831  | 0.031* |
| With                                         | 0      | 0.12      | 0.00                           | 1       | 7.27    | 13,761.92                      | 0.000                        | 0.000       | -      | -      | 0.999  |
| <b>Obesity</b>                               |        |           |                                |         |         |                                |                              |             |        |        |        |
| Without                                      | 218    | 12,034.71 | 1811.43                        | 42      | 3169.44 | 1325.15                        | 1.367                        | 1.314       | 1.040  | 1.842  | 0.029* |
| With                                         | 0      | 0.07      | 0.00                           | 0       | 0.10    | 0.00                           | -                            | -           | -      | -      | -      |
| <b>Alcoholism</b>                            |        |           |                                |         |         |                                |                              |             |        |        |        |
| Without                                      | 218    | 12,033.40 | 1811.63                        | 42      | 3165.01 | 1327.01                        | 1.365                        | 1.314       | 1.040  | 1.842  | 0.029* |
| With                                         | 0      | 1.39      | 0.00                           | 0       | 4.53    | 0.00                           | -                            | -           | -      | -      | -      |
| <b>Chronic lymphocytic thyroiditis</b>       |        |           |                                |         |         |                                |                              |             |        |        |        |
| Without                                      | 218    | 11,841.83 | 1840.93                        | 42      | 3121.41 | 1345.55                        | 1.368                        | 1.314       | 1.040  | 1.842  | 0.029* |
| With                                         | 0      | 192.95    | 0.00                           | 0       | 48.13   | 0.00                           | -                            | -           | -      | -      | -      |
| <b>Celiac disease</b>                        |        |           |                                |         |         |                                |                              |             |        |        |        |
| Without                                      | 218    | 11,648.89 | 1871.42                        | 42      | 3075.67 | 1365.56                        | 1.370                        | 1.314       | 1.040  | 1.842  | 0.029* |
| With                                         | 0      | 352.89    | 0.00                           | 0       | 96.87   | 0.00                           | -                            | -           | -      | -      | -      |
| <b>Thyrogen</b>                              |        |           |                                |         |         |                                |                              |             |        |        |        |
| Without                                      | 205    | 11,575.45 | 1770.99                        | 40      | 3060.57 | 1306.95                        | 1.355                        | 1.308       | 1.035  | 1.824  | 0.031* |
| With                                         | 13     | 459.33    | 2830.21                        | 2       | 108.97  | 1835.57                        | 1.542                        | 1.529       | 1.098  | 1.876  | 0.001* |
| <b>Levothyroxine dose</b>                    |        |           |                                |         |         |                                |                              |             |        |        |        |
| < 33% (60 µg / day)                          | 109    | 6173.25   | 1765.68                        | 28      | 2135.27 | 1323.97                        | 1.347                        | 1.282       | 1.016  | 1.797  | 0.037* |
| ≥ 33% (60 µg / day),<br>< 67% (128 µg / day) | 75     | 3991.22   | 1879.12                        | 9       | 661.08  | 1327.61                        | 1.380                        | 1.361       | 1.078  | 1.909  | 0.011* |
| ≥ 67% (128 µg / day)                         | 34     | 1870.31   | 1817.88                        | 5       | 373.19  | 1327.23                        | 1.357                        | 1.317       | 1.042  | 1.845  | 0.027* |

Adjusted HR means adjusted for variables listed in the table. PYs = Person-years; RAI, radioactive iodine; HR, hazard ratio; CI, confidence interval; \*  $p < 0.05$ .
